# Supplementary material for: Feasibility of mobilisation in ICU: a multi-centre point prevalence study of mobility practices in the UK
Source: Springer Nature journal article supplement (doi:10.1186/s13054-023-04508-4), 2023-06-01
Supplement: MOESM1 [file 25434826]

# Supplementary Material

## Table 1 - Demographic and Physiological data collected

---

| Field                                                            |
|------------------------------------------------------------------|
| Critical Care Demographics                                       |
| ICU speciality                                                   |
| Number of (HDU) level 2 beds                                     |
| Number of (ICU) level 3 beds                                     |
| Other ICU speciality                                             |
| Total number of ICU beds                                         |
| Number of WTE physiotherapists                                   |
| Patient Demographics                                             |
| Age                                                              |
| Type of admission                                                |
| Date of admission to critical care                               |
| Source of admission                                              |
| Length of stay (days) in previous ICU before transfer            |
| Days of mechanical ventilation                                   |
| Primary diagnosis                                                |
| Sex                                                              |
| APACHE II                                                        |
| Comorbidities                                                    |
| Weight in Kg                                                     |
| Height in cm                                                     |
| Clinical Frailty Scale.                                          |
| Respiratory                                                      |
| Airway                                                           |
| Mode of Respiratory Support                                      |
| Mandatory or back up respiratory rate                            |
| PEEP or EPAP                                                     |
| FiO2                                                             |
| O2 flow in l/min (NC, face mask, Swedish Nose, high flow oxygen) |
| Total respiratory rate                                           |
| CVS                                                              |
| Cardiac assist device                                            |
| ECCO2 removal device                                             |
| ECMO type                                                        |
| Systolic                                                         |
| Diastolic                                                        |
| MAP                                                              |
| HR                                                               |
| Rhythm                                                           |
| Pharmacological CVS Support                                      |
| Adrenaline                                                       |
| Noradrenaline                                                    |
| Dobutamine                                                       |
| Dopamine                                                         |
| ADH (vasopressin)                                                |
| Enoximone                                                        |

(continued)

---

Field

---

Isoprenaline  
Levosimendan  
Phenylephrine  
Milrinone  
Metaraminol

Neuro

Paralysed with neuromuscular blocking agents

RASS

GCS

Intracranial pressure (ICP) measured?

Intracranial pressure

CAM-ICU

Sedated

Propofol

Midazolam

Ketamine

Dexmedetomidine

Fentanyl (including 'remi' and 'al')

Labs

pH

PaCO<sub>2</sub>

PaO<sub>2</sub>

WCC

K<sup>+</sup>

Hb

CRP

Creatinine

Bilirubin

Platelets

Renal

Is the patient receiving renal replacement therapy

Vascular Catheter Placement

Rehab

Specific movement restrictions

ICU Mobility Scale score achieved today

Time of intervention

Why did this patient not complete active rehabilitation (against gravity) today? Please give your top 3 reasons for not rehabing.

Highest ICU Mobility Scale score achieved during admission

On what day did this patient first participate in active rehabilitation against gravity (ICU Mobility Scale of 3 or more)?

Did you achieve the ICU Mobility Scale outcome that you were anticipating to complete before the session?

Profession of staff making decision to mobilise

Band of staff making decision to mobilise

Number of staff required to mobilise

---

**Table 2 - Non-Physiological barriers to mobilisation**

| Reason for Exclusion                                        | n  |
|-------------------------------------------------------------|----|
| Movement restrictions - appropriate mobility level achieved | 31 |
| Staffing                                                    | 30 |
| Awaiting medical procedure                                  | 22 |
| Dying                                                       | 16 |
| Intervention as per site rehabilitation plan                | 14 |
| Patient declined                                            | 12 |
| At baseline level of mobility                               | 8  |
| Medical procedure in progress                               | 8  |
| Movement restrictions-specific                              | 7  |
| Motor block                                                 | 2  |
| Equipment                                                   | 1  |

**Table 3 - Summary LOS <= 3 days**

|                                  | Mobilised              | Non-Physiological Barriers | Not Mobilised         | p      |
|----------------------------------|------------------------|----------------------------|-----------------------|--------|
| n                                | 180                    | 51                         | 140                   |        |
| Type of admission (%)            |                        |                            |                       | <0.001 |
| Elective Surgery                 | 109 ( 60.6)            | 16 ( 31.4)                 | 39 ( 27.9)            |        |
| Emergency Surgery                | 24 ( 13.3)             | 13 ( 25.5)                 | 30 ( 21.4)            |        |
| Medical                          | 44 ( 24.4)             | 19 ( 37.3)                 | 63 ( 45.0)            |        |
| Other                            | 3 ( 1.7)               | 3 ( 5.9)                   | 8 ( 5.7)              |        |
| Gender = Male (%)                | 110 ( 61.1)            | 27 ( 52.9)                 | 86 ( 61.4)            | 0.530  |
| Renal Replacement Therapy (%)    | 2 ( 1.1)               | 2 ( 3.9)                   | 18 ( 12.9)            | <0.001 |
| Airway                           |                        |                            |                       | <0.001 |
| Nasal ETT                        | 0 ( 0.0)               | 0 ( 0.0)                   | 1 ( 0.7)              |        |
| Oral ETT                         | 2 ( 1.1)               | 8 ( 15.7)                  | 78 ( 55.7)            |        |
| Own                              | 175 ( 97.2)            | 40 ( 78.4)                 | 59 ( 42.1)            |        |
| Tracheostomy                     | 3 ( 1.7)               | 3 ( 5.9)                   | 2 ( 1.4)              |        |
| Nova lung (%)                    | 0 ( 0.0)               | 0 ( 0.0)                   | 1 ( 0.7)              | 0.515  |
| ecmo_yn = 0 (%)                  | 180 (100.0)            | 51 (100.0)                 | 140 (100.0)           | NA     |
| cardiac_assist_device = None (%) | 180 (100.0)            | 51 (100.0)                 | 136 ( 97.1)           | 0.045  |
| FiO2 median [IQR]                | 0.24 [0.21, 0.33]      | 0.24 [0.21, 0.38]          | 0.30 [0.24, 0.40]     | <0.001 |
| P:F median [IQR]                 | 40.18 [30.02, 50.83]   | 44.24 [27.18, 55.23]       | 35.93 [25.67, 44.71]  | 0.026  |
| Haemoglobin median [IQR]         | 106.00 [89.50, 119.00] | 96.00 [84.00, 112.00]      | 98.50 [84.00, 119.00] | 0.184  |
| CRP median [IQR]                 | 66.40 [27.50, 167.50]  | 73.80 [18.88, 187.57]      | 90.00 [29.90, 192.75] | 0.549  |
| WCC median [IQR]                 | 10.90 [8.72, 13.70]    | 12.12 [8.27, 14.46]        | 11.75 [8.95, 15.72]   | 0.139  |
| MAP median [IQR]                 | 85.17 [76.33, 93.67]   | 83.67 [76.17, 92.50]       | 79.33 [71.00, 91.42]  | 0.036  |
| HR median [IQR]                  | 83.00 [70.00, 90.25]   | 79.00 [68.00, 97.50]       | 81.50 [69.75, 95.25]  | 0.967  |
| VIS total Median [IQR]           | 0.00 [0.00, 0.00]      | 0.00 [0.00, 0.00]          | 0.00 [0.00, 8.50]     | <0.001 |
| Metaraminol dose median [IQR]    | 0.70 [0.47, 1.08]      | 1.39 [0.49, 1.50]          | 1.07 [0.43, 1.21]     | 0.620  |

**Table 4 - Missing data**

|                                    | Number of missing values |
|------------------------------------|--------------------------|
| PaO <sub>2</sub> :FiO <sub>2</sub> | 207                      |
| PaCO <sub>2</sub>                  | 201                      |
| PaO <sub>2</sub>                   | 201                      |
| pH                                 | 199                      |
| Respiratory Rate                   | 53                       |
| C Reactive Protein                 | 34                       |
| Height                             | 23                       |
| Weight                             | 18                       |
| FiO <sub>2</sub>                   | 7                        |
| Creatinine                         | 7                        |
| Bilirubin                          | 7                        |
| Heart Rhythm                       | 4                        |
| White Cell Count                   | 4                        |
| Potassium                          | 4                        |
| Platlets                           | 4                        |
| Haemaglobin                        | 2                        |
| Primary Diagnosis                  | 1                        |
| Cam-ICU                            | 1                        |

**Table 5 - Vasoactive-inotropic score calculations**

Drug Dose Administrated to Achieve a VIS of 10

| Drug           | Dose Administrated to Achieve a VIS of 10       |
|----------------|-------------------------------------------------|
| Dopamine       | 10 µg/kg/min                                    |
| Dobutamine     | 10 µg/kg/min                                    |
| Enoximone      | 10 µg/kg/min                                    |
| Phenylephrine  | 1 µg/kg/min                                     |
| Milrinone      | 1 µg/kg/min                                     |
| Olprinone      | 1 µg/kg/min <sup>*</sup>                        |
|                | 0.4 µg/kg/min <sup>†</sup>                      |
| Levosimendan   | 0.2 µg/kg/min                                   |
| Epinephrine    | 0.1 µg/kg/min                                   |
| Norepinephrine | 0.1 µg/kg/min                                   |
| Vasopressin    | 0.001 U/kg/min (0.07 U/min for a 70 kg patient) |

**Table 6 – RAG rating categorisation**

| Item                                                          | RAG           |
|---------------------------------------------------------------|---------------|
| <b>Respiratory</b>                                            |               |
| FiO2 > 0.6                                                    | Amber         |
| SaO2 < 0.9                                                    | Red           |
| RR >30                                                        | Amber         |
| HFOV                                                          | Red           |
| PEEP > 10                                                     | Amber         |
| Ventilator Dysynchrony *                                      | Amber         |
| <b>Rescue Therapies</b>                                       |               |
| Nitric oxide                                                  | Not Collected |
| Prostocyclin                                                  | Not Collected |
| Prone Positioning                                             | Not Collected |
| <b>Cardiovascular</b>                                         |               |
| IV anti-hypertensives for hypertensive emergency *            | Red           |
| MAP Symptomatic below target on vasoactive agents *           | Red           |
| Known or suspected severe pulmonary hypertension *            | Amber         |
| Bradycardia requiring pharmacological treatment               | Red           |
| Bradycardia not requiring pharmacological treatment           | Amber         |
| Transvenous or epipericardial pacemaker with dependent rhythm | Red           |
| Vent Dy synchrony*                                            | Amber         |
| ST > 150                                                      | Red           |
| ST 120 – 150                                                  | Amber         |
| Femoral IABP                                                  | Red           |
| ST 120 – 150                                                  | Amber         |
| ECMO Femoral or subclavian                                    | Red           |
| ECMO Single bicaval                                           | Amber         |
| Pulmonary artery catheter *                                   | Amber         |
| Shock of any cause with lactate >4mmol/L *                    | Amber         |
| DVT/PE *                                                      | Amber         |
| Cardiac Ischemia *                                            | Red           |
| Known or suspected severe Aortic Stenosis *                   | Amber         |
| <b>Neurological</b>                                           |               |
| RASS -2 or +2                                                 | Amber         |
| RASS < -2                                                     | Red           |
| RASS +2 or combative *                                        | Red           |
| Delirium +tve and able to follow simple commands*             | Amber         |
| Delirium +tve and not able to follow simple commands *        | Amber         |
| Active management of ICP with ICP not in desired range *      | Red           |
| ICP monitoring without active management of ICP *             | Amber         |
| Uncontrolled seizures*                                        | Red           |
| Vasospasm *                                                   | Amber         |
| Craniectomy *                                                 | Amber         |
| Open Lumbar drain not clamped *                               | Red           |
| Subgaleal drain *                                             | Amber         |
| Spinal Precautions *                                          | Red           |
| Acute Spinal Cord Injury *                                    | Amber         |
| Sub arachnoid Haemorrhage with unclipped aneurysm *           | Amber         |
| <b>Surgical</b>                                               |               |
| Unstabilised major fractures *                                | Red           |
| Open Surgical Wounds *                                        | Red           |
| <b>Medical</b>                                                |               |

| Item                                       | RAG           |
|--------------------------------------------|---------------|
| Known uncontrolled active Bleeding*        | Red           |
| Febrile with temperature exceeding maximum | Not Collected |
| Active Hypothermia                         | Not Collected |
| Femoral Sheath                             | Not Collected |

\* documented in reasons not mobilised
